# Supplementary material
Source: PubMed Central journal article supplement (PMC4103261)
Supplement: Supp_Fig2.pdf [file Supp_Fig2.pdf]

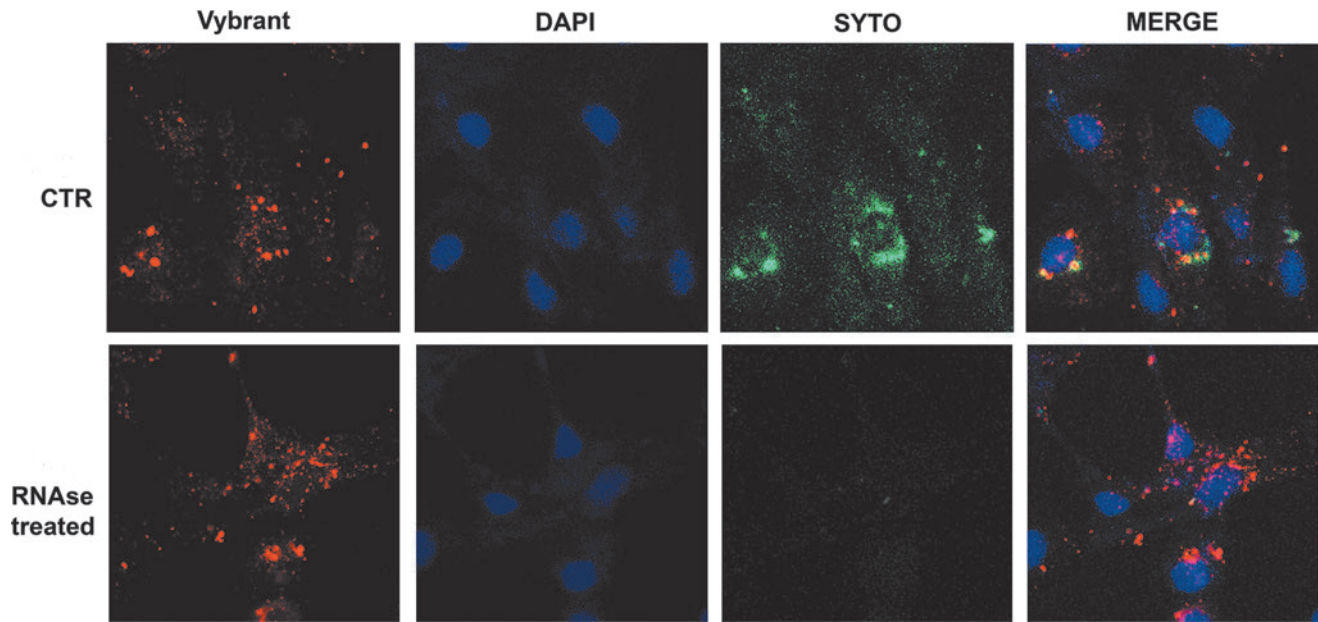

**SUPPLEMENTARY FIG. S2.** Specificity of RNA staining by RNase treatment of MSC-EVs. Double-labeled MSC-EVs treated or not with RNase were incubated with PTECs for 24 h. Vybrant (*red*) indicates the stained membrane of MSC-EVs and SYTO (*green*) indicates stained RNA derived from MSC-EVs. Nuclei stained by DAPI are *blue*. Three experiments were performed with similar results using MSC-EVs derived from different MSCs. Original magnification:  $\times 630$ . CTR, control group.
